# Supplementary material for: Low-temperature SnO2-based electron selective contact for efficient and stable perovskite solar cells
Source: Royal Society of Chemistry journal article supplement (doi:10.1039/c5ta01207d), 2015-01-01
Supplement: c5ta01207d1.pdf [file c5ta01207d1.pdf]

## Supporting Information

### Low-temperature SnO<sub>2</sub>-based electron selective contact for efficient and stable perovskite solar cells

Jiaxing Song<sup>a</sup>, Enqiang Zheng<sup>b</sup>, Ji Bian<sup>a</sup>, Xiao-Feng Wang<sup>b\*</sup>, Wenjing Tian<sup>a\*</sup>, Yoshitaka Sanehira<sup>c</sup> and Tsutomu Miyasaka<sup>c</sup>

<sup>a</sup> State Key Laboratory of Supramolecular Structure and Materials, Jilin University, Changchun 130012, PR China

<sup>b</sup> Key Laboratory of Physics and Technology for Advanced Batteries, Ministry of Education, College of Physics, Jilin University, Changchun 130012, PR China

<sup>c</sup> Graduate School of Engineering, Toin University of Yokohama, 1614 Kurogane-cho, Aoba, Yokohama, Kanagawa 225-8503, Japan

E-mails: [xf\\_wang@jlu.edu.cn](mailto:xf_wang@jlu.edu.cn) (X.-F. Wang) and [wjtian@jlu.edu.cn](mailto:wjtian@jlu.edu.cn) (W. Tian)

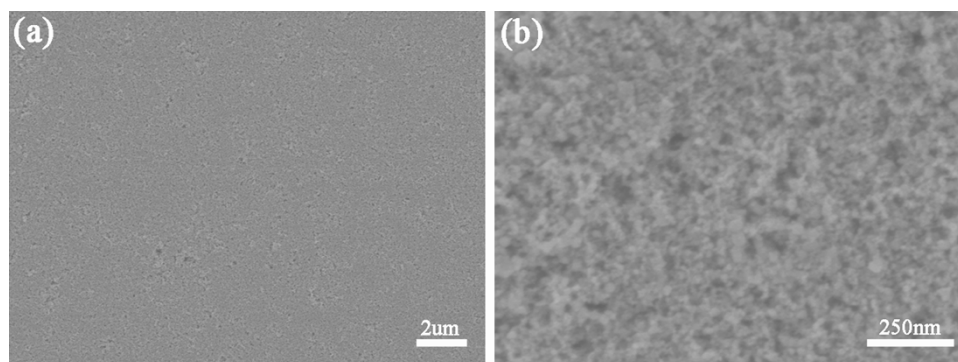

**Figure S1.** The low and high magnification SEM micrographs of ITO/SnO<sub>2</sub> film. (a) low magnification (b) high magnification

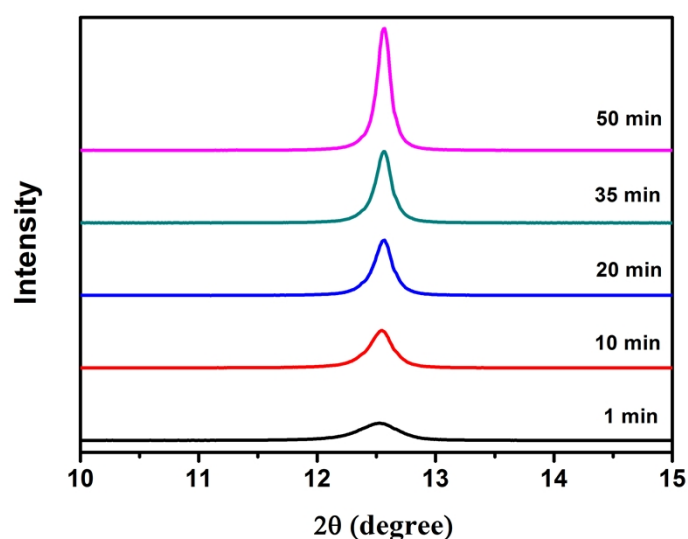

**Figure S2.** The enlarged X-ray diffraction patterns of ITO/SnO<sub>2</sub>/PbI<sub>2</sub> films at 2θ = 12.56° with different SVA time for PbI<sub>2</sub> layers.

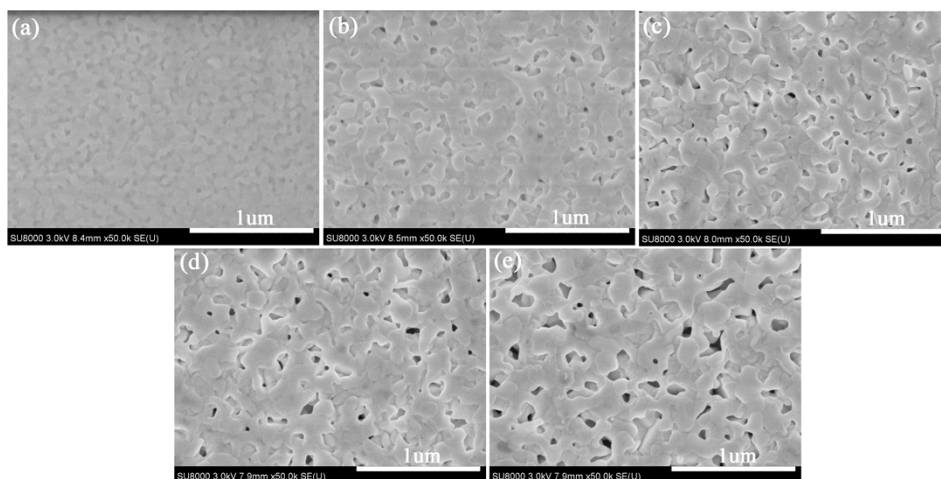

**Figure S3.** Low magnification SEM micrographs of ITO/SnO<sub>2</sub>/PbI<sub>2</sub> thin films for different SVA times (a) 1min, (b) 10 min, (c) 20 min, (d) 35 min, and (e) 50 min.

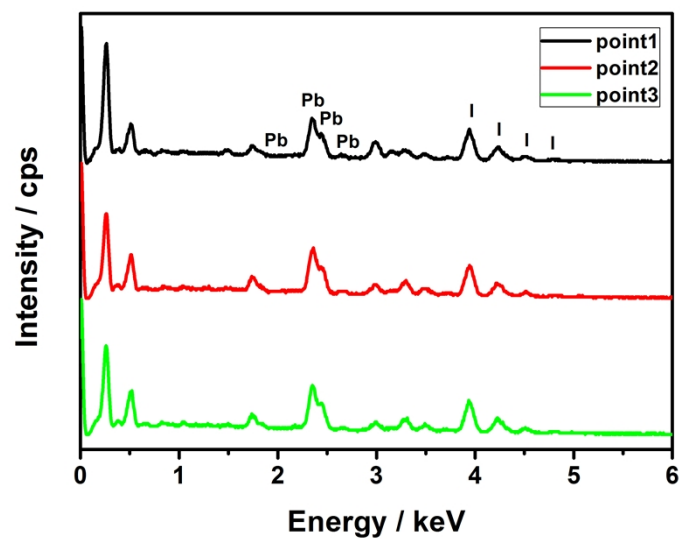

**Figure S4.** The EDX patterns for the perovskite layer obtained from the PbI<sub>2</sub> with 10 min SVA time.

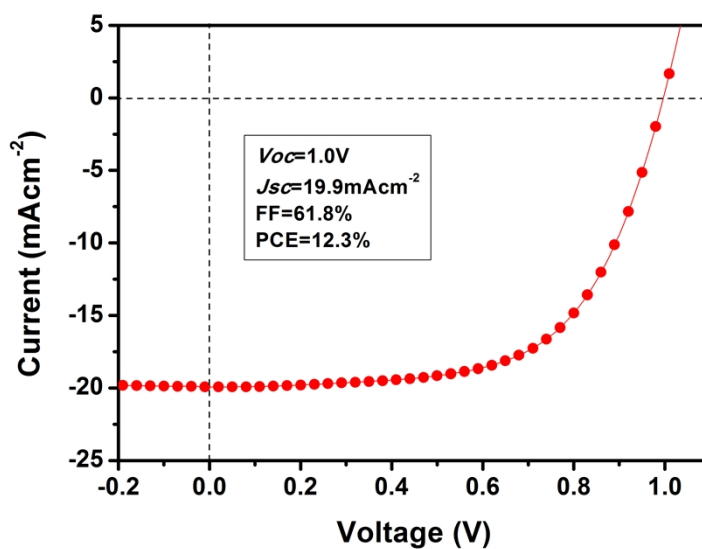

**Figure S5.** *J-V* characteristic for the FTO/TiO<sub>2</sub>/CH<sub>3</sub>NH<sub>3</sub>PbI<sub>3</sub>/spiro-OMeTAD/Ag device measured under 100 mWcm<sup>-2</sup> AM 1.5G illumination.

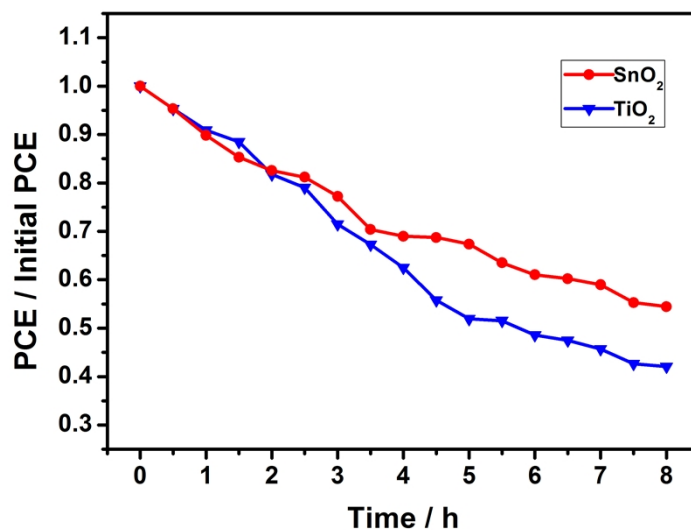

**Figure S6.** Illumination durability of the SnO<sub>2</sub>-based and TiO<sub>2</sub>-based PSC devices under simulated sunlight illumination.

## TiO<sub>2</sub>-based solar cell fabrication

The pre-patterned FTO substrates were cleaned with detergent, deionized water, acetone, and 2-propanol in sequence. The compact TiO<sub>2</sub> thin films were prepared according to the literature procedures.<sup>1</sup> All of the other procedures for the fabrication of TiO<sub>2</sub>-based solar cells were same with that of the SnO<sub>2</sub>-based solar cells.

## Notes and references

1 H.-S. Kim, C.-R. Lee, J.-H. Im, K.-B. Lee, T. Moehl, A. Marchioro, S.-J. Moon, R. Humphry-Baker, J.-H. Yum, J. E. Moser, M. Grätzel and N.-G. Park, *Sci. Rep.* 2012, **2**, 591/1-591/7.
